# Supplementary material
Source: MDPI journal article supplement (https://www.mdpi.com/2674-0389/3/1/7)
Supplement: s1 [file s1]

**Figure S1:** Naphthol concentration calibration curve at wavelength of 540 nm

**Figure S2:** RNA gel-electrophoresis image

**Figure S3:** Bioanalyzer RNA gel-electrophoresis image

**Table S1:** The specific growth rate ( $\mu$ , day<sup>-1</sup>), and the doubling time ( $t_d$ , days) for each individual concentration. All standard deviations are within 5% of the  $\mu_{\max}$  (day<sup>-1</sup>).

| Days | Specific growth rate ( $\mu$ , day <sup>-1</sup> ) |                 |                 |                 |                  | Doubling time ( $t_d$ , days) |                 |                    |                    |                  |
|------|----------------------------------------------------|-----------------|-----------------|-----------------|------------------|-------------------------------|-----------------|--------------------|--------------------|------------------|
|      | 0 $\mu\text{M}$                                    | 3 $\mu\text{M}$ | 5 $\mu\text{M}$ | 6 $\mu\text{M}$ | 10 $\mu\text{M}$ | 0 $\mu\text{M}$               | 3 $\mu\text{M}$ | 5 $\mu\text{M}$    | 6 $\mu\text{M}$    | 10 $\mu\text{M}$ |
| 0    | -0.10                                              | -0.08           | -0.22           | -0.14           | -0.03            | NA                            | NA              | NA                 | NA                 | NA               |
| 1    | 0.11                                               | 0.15            | 0.13            | 0.20            | 0.31             | NA                            | NA              | NA                 | NA                 | NA               |
| 2    | 0.24                                               | 0.27            | 0.35            | 0.41            | 0.53             | NA                            | NA              | NA                 | 1.67<br>(40 hours) | 1.30 (31 hours)  |
| 3    | 0.31                                               | 0.30            | 0.38            | 0.38            | 0.38             | 2.25<br>(54 hours)            | 2.32 (56 hours) | 1.80<br>(43 hours) | NA                 | NA               |
| 4    | 0.22                                               | 0.23            | 0.30            | 0.28            | 0.27             | NA                            | NA              | NA                 | NA                 | NA               |
| 5    | 0.17                                               | 0.19            | 0.23            | 0.22            | 0.23             | NA                            | NA              | NA                 | NA                 | NA               |
| 6    | 0.14                                               | 0.14            | 0.18            | 0.16            | 0.15             | NA                            | NA              | NA                 | NA                 | NA               |
| 7    | 0.10                                               | 0.10            | 0.13            | 0.12            | 0.11             | NA                            | NA              | NA                 | NA                 | NA               |
| 8    | 0.05                                               | 0.05            | 0.08            | 0.07            | 0.06             | NA                            | NA              | NA                 | NA                 | NA               |
| 9    | 0.00                                               | -0.01           | 0.03            | 0.01            | 0.00             | NA                            | NA              | NA                 | NA                 | NA               |
| 10   | -0.07                                              | -0.08           | -0.04           | -0.07           | -0.08            | NA                            | NA              | NA                 | NA                 | NA               |

**Table S2:** Methanobactin-mediated cellular genes, and the physical protein-protein interactions (PPIs) between the methanobactin synthesis cassette genes (*mbnB* and *mbnC*), MMOs and other enriched genes.

| Gene ID/ ORF                                 | Gene name   | UNIPROT ID | Protein names                                  | Function                                                                            | GO term (Cellular Location) | GO term (Biological Process) | GO term (Molecular Process) |
|----------------------------------------------|-------------|------------|------------------------------------------------|-------------------------------------------------------------------------------------|-----------------------------|------------------------------|-----------------------------|
| <b>Transport system/ signal transduction</b> |             |            |                                                |                                                                                     |                             |                              |                             |
| CQW49_16885                                  | NA          | A0A2D2D2Z0 | Efflux transporter periplasmic adaptor subunit | Tripartite efflux assemblies                                                        | NA                          | NA                           | NA                          |
| CQW49_11995                                  | <i>LptC</i> | A0A2D2D0J1 | LPS export ABC transporter periplasmic protein | Tripartite efflux assemblies                                                        | GO:0005887                  | NA                           | GO:0015221                  |
| CQW49_12590                                  | NA          | A0A2D2D0V5 | Apolipoprotein acyltransferase                 | Nutrient uptake/ signal transduction/ adhesion                                      | GO:0042157<br>GO:0006869    | GO:0016021<br>GO:0005576     | GO:0008289<br>GO:0016746    |
| CQW49_01190                                  | NA          | A0A2D2CV99 | Cytochrome c                                   | Electron transfer and energy transduction                                           |                             |                              | GO:0020037<br>GO:0009055    |
| CQW49_18585                                  | NA          | A0A2D2D697 | Cytochrome b                                   | Electron transfer and energy transduction                                           | GO:0022904                  | GO:0016021                   |                             |
| CQW49_03150                                  | NA          | A0A2D2CW27 | Symporter-like protein                         | Transport of two different molecules across the cell membrane in the same direction | NA                          | GO:0016021                   | GO:0022857                  |
| CQW49_19365                                  | NA          | A0A2D2D4B1 | Porin                                          | Passive diffusion of selective molecules across the membrane                        | NA                          | NA                           | NA                          |
| CQW49_15440                                  | NA          | A0A2D2D294 | Permease                                       | Catalyzes the transport of substance across the                                     | NA                          | GO:0016021<br>GO:0005886     | NA                          |

membrane

| Cell wall biosynthesis/regulation/degradation |             |            |                                                    |                                                                  |            |            |                                        |
|-----------------------------------------------|-------------|------------|----------------------------------------------------|------------------------------------------------------------------|------------|------------|----------------------------------------|
| CQW49_00125                                   | NA          | A0A2D2CUV8 | CDP-alcohol phosphatidyltransferase                | Biosynthesis                                                     | NA         | GO:0016021 | GO:0016740                             |
| CQW49_13240                                   | NA          | A0A2D2D5S9 | Peptidoglycan glycosyltransferase                  | Shape/ size/ protection                                          | GO:0009252 | GO:0016021 | GO:0008955<br>GO:0008658<br>GO:0004180 |
| CQW49_15485                                   | NA          | A0A2D2D281 | Peptidoglycan -binding protein                     | Degradation                                                      | NA         | NA         | NA                                     |
| Methanobactin genes                           |             |            |                                                    |                                                                  |            |            |                                        |
| CQW49_19010                                   | <i>mbnT</i> | A0A2D2D407 | TonB-dependent receptor                            | substrate-specific transport across the outer membrane           | NA         | GO:0009279 | NA                                     |
| CQW49_07140                                   | <i>mbnH</i> | A0A2D2CY67 | Metallo-mystery pair system four-Cys motif protein | Copper homeostasis                                               | NA         | NA         | NA                                     |
| CQW49_16895                                   | <i>mbnM</i> | A0A2D2D5Z2 | TolC family protein                                | Export mechanism (multidrug resistance efflux pump)              | NA         | NA         | GO:0015562                             |
| CQW49_16840                                   | NA          | A0A2D2D311 | RNA polymerase subunit sigma-24                    | Efficient binding of RNA to promoter and regulates transcription | GO:0006352 | NA         | GO:0003677<br>GO:0016987               |
| CQW49_09150                                   | NA          | A0A2D2CZ69 | Class I SAM-dependent methyltransferase            | Transfer of methyl groups                                        | GO:0032259 | NA         | GO:0008168                             |
| CQW49_07150                                   | <i>mbnM</i> | A0A2D2CY63 | Multidrug resistance protein NorM                  | Export of substances across the membrane                         | NA         | GO:0016021 | GO:0042910<br>GO:0015297               |
| CQW49_07145                                   | <i>mbnN</i> | A0A2D2CY   | Aminotransferase                                   | Mbn                                                              | GO:0009058 | NA         | GO:0008483                             |

G3      ase class I and      production      GO:0030170  
II

| Methane monooxygenases |             |            |                                                       |                                                                                                             |            |            |            |
|------------------------|-------------|------------|-------------------------------------------------------|-------------------------------------------------------------------------------------------------------------|------------|------------|------------|
| CQW49_01225            | <i>pmoB</i> | A0A2D2D5S7 | Methane monooxygenase/ammonia monooxygenase subunit B | Methane oxidation                                                                                           | NA         | GO:0016021 | GO:0004497 |
| CQW49_01220            | <i>pmoA</i> | A0A2D2D011 | Methane monooxygenase/ammonia monooxygenase subunit A | Methane oxidation                                                                                           | NA         | GO:0016021 | GO:0004497 |
| CQW49_19210            | <i>pmoC</i> | A0A2D2D6S7 | Methane monooxygenase/ammonia monooxygenase subunit C | Methane oxidation                                                                                           | NA         | GO:0016021 | GO:0004497 |
| CQW49_12480            | <i>mmoX</i> | A0A2D2D5X0 | Methane monooxygenase component A alpha chain         | Methane oxidation                                                                                           | GO:0006725 | NA         | GO:0004497 |
| CQW49_12470            | <i>mmoB</i> | A0A2D2D0T8 | Methane monooxygenase regulatory protein B            | Regulator of electron flow through the soluble mmo complex/switching the enzyme from oxidase to hydroxylase | GO:0006725 | NA         | GO:0004497 |
| CQW49_12460            | <i>mmoD</i> | A0A2D2D0X7 | Soluble methane monooxygenase-binding protein MmoD    | Conformational changes within the hydroxylase catalytic center                                              | NA         | NA         | GO:0004497 |
| CQW49_12475            | <i>mmoR</i> | A0A2D2D5X7 | Methane monooxygenase reductase subunit               | shuttles electrons from NADH to the active site of hydroxylase                                              | GO:0006725 | NA         | GO:0016709 |
| Copper-associated      |             |            |                                                       |                                                                                                             |            |            |            |
| CQW49_01240            | <i>copD</i> | A0A2D2CV   | Copper resistance                                     | Putative involvement in                                                                                     | GO:0006825 | GO:0005886 | GO:0046872 |

|                                                                 |             |             |                                     |                                       |                          |            |            |
|-----------------------------------------------------------------|-------------|-------------|-------------------------------------|---------------------------------------|--------------------------|------------|------------|
| CQW49_20210                                                     |             | 13          | protein                             | copper uptake                         |                          | GO:0042597 | GO:0020037 |
|                                                                 |             | A0A2D2D4L4  |                                     |                                       |                          | GO:0016021 | GO:0009055 |
| CQW49_02930                                                     | <i>copC</i> | A0A2D2D5A2  | Copper resistance protein           | Putative involvement in copper uptake | GO:0046688<br>GO:0006825 | GO:0042597 | GO:0005507 |
| <b>Hypothetical genes / domain containing genes<sup>1</sup></b> |             |             |                                     |                                       |                          |            |            |
| CQW49_18195                                                     | NA          | A0A2D2D3P3  | Uncharacterized protein             | NA                                    | NA                       | GO:0016021 | NA         |
| CQW49_17470                                                     | NA          | A0A2D2D3N0  | MaoC-like domain-containing protein | NA                                    | NA                       | NA         | NA         |
| CQW49_16865                                                     | NA          | A0A2D2D3D0  | GSCFA domain-containing protein     | NA                                    | NA                       | NA         | NA         |
| CQW49_16540                                                     | NA          | A0A2D2D367  | Uncharacterized protein             | NA                                    | NA                       | GO:0016021 | NA         |
| CQW49_16090                                                     | NA          | A0A2D2D2J0  | Uncharacterized protein             | NA                                    | NA                       | NA         | NA         |
| CQW49_14355                                                     | NA          | A0A2D2D1T4  | DGQHR domain-containing protein     | NA                                    | NA                       | NA         | NA         |
| CQW49_02010                                                     | NA          | A0A2D2CVS6  | DUF2232 domain-containing protein   | NA                                    | NA                       | GO:0016021 | NA         |
| CQW49_12920                                                     | NA          | A0A2D2D107  | Uncharacterized protein             | NA                                    | NA                       | NA         | NA         |
| CQW49_12835                                                     | NA          | A0A2D2D1C4  | Uncharacterized protein             | NA                                    | NA                       | GO:0016021 | NA         |
| CQW49_11915                                                     | NA          | A0A2D2D0I2  | Uncharacterized protein             | NA                                    | NA                       | NA         | NA         |
| CQW49_11245                                                     | NA          | A0A2D2D096  | Uncharacterized protein             | NA                                    | NA                       | GO:0016021 | NA         |
| CQW49_01770                                                     | NA          | A0A2D2CV C1 | DUF2147 domain-containing protein   | NA                                    | NA                       | NA         | NA         |

|             |    |                |                                             |    |    |            |            |
|-------------|----|----------------|---------------------------------------------|----|----|------------|------------|
| CQW49_10090 | NA | A0A2D2CZ<br>P3 | YIP1 family<br>protein                      | NA | NA | GO:0016021 | NA         |
| CQW49_09945 | NA | A0A2D2CZ<br>H7 | Uncharacteriz<br>ed protein                 | NA | NA | NA         | NA         |
| CQW49_08865 | NA | A0A2D2CZ<br>B0 | NfeD domain-<br>containing<br>protein       | NA | NA | GO:0016021 | NA         |
| CQW49_06205 | NA | A0A2D2CX<br>U2 | SPOR<br>domain-<br>containing<br>protein    | NA | NA | NA         | GO:0042834 |
| CQW49_06135 | NA | A0A2D2CX<br>S9 | DUF2336<br>domain-<br>containing<br>protein | NA | NA | NA         | NA         |
| CQW49_00040 | NA | A0A2D2CU<br>X7 | DUF202<br>domain-<br>containing<br>protein  | NA | NA | GO:0016021 | NA         |

---

Note: More details are included in text under section 3.5. <sup>1</sup>Their roles need to be validated experimentally.

**Table S3:** StringDb enrichment statistics (Excel file)

**Table S4:** Network analysis between the enriched genes (Excel file)



**Table S5:** Forward and reverse primers of gene sets used in expression studies.

| Operon                            | Gene Id     | Gene names        | Protein accession ID | Primer name | qPCR Primer sequence (5'→ 3') |
|-----------------------------------|-------------|-------------------|----------------------|-------------|-------------------------------|
| sMMO                              | NA          | <i>mmoX</i>       | CAA39068.2           | Forward     | TGGAGTGCTCGGTCAATCTG          |
|                                   |             |                   |                      | Reverse     | GACACCACGGTCTGGTAGCC          |
|                                   | NA          | <i>mmoR</i>       | CAD61955.1           | Forward     | GACCGCTCTGCGCAAAGCC           |
|                                   |             |                   |                      | Reverse     | CCCTCATAGCCGAACAATTCG         |
| pMMO                              | NA          | <i>mmoC</i>       | CAB45257.1           | Forward     | AGGAGGAGGACGGCAAGGTT<br>C     |
|                                   |             |                   |                      | Reverse     | AGCACGAGACGCACGACATT<br>GG    |
|                                   | NA          | <i>pmo operon</i> | U31650.2             | Forward     | GCGTTCTTCTCGGGCTTCG           |
|                                   |             |                   |                      | Reverse     | CGGCCTCACTCGTCTTCTCC          |
| pMMO                              | NA          | <i>pmoA</i>       | AAA87220.2           | Forward     | TGCTGATCGGGGAGTGGATC          |
|                                   |             |                   |                      | Reverse     | ACGTGCGGACGAAGTGGAA           |
|                                   | NA          | <i>pmoB</i>       | AAF37894.1           | Forward     | ACATGGCCGACTTCAAGGATC<br>C    |
|                                   |             |                   |                      | Reverse     | TCGCTGATGCGAAGATAAGAA<br>CG   |
| pMMO                              | NA          | <i>pmoC</i>       | AAF37893.1           | Forward     | TGGAAGACCCGTGACCGC            |
|                                   |             |                   |                      | Reverse     | ATGTGCGACGGCGTGAAGT           |
| <i>Mbn</i> operon (methanobactin) | CQW49_07125 | NA                | ATQ67685.1           | Forward     | AGGAAATCGACATCTGCGCT          |
|                                   |             |                   |                      | Reverse     | GGAGATTGCAATTCGGCTCG          |
|                                   | CQW49_07130 | NA                | ATQ67686.1           | Forward     | FCCGCAGATCCGCCATATGAT         |
|                                   |             |                   |                      | Reverse     | ATACGCAGATACGCCTGTCTG         |
|                                   | CQW49_07135 | NA                | ATQ67687.1           | Forward     | CATAGCGGCTGTCTGAAGGAA         |
|                                   |             |                   |                      | Reverse     | GCCAATAAGGCGGAGATCGT          |
|                                   | CQW49_07140 | NA                | ATQ67688.1           | Forward     | AGAGAATATCGGCGAGACGC          |
|                                   |             |                   |                      | Reverse     | TTTGACGACGCTGTTCGAGA          |
|                                   | CQW49_07175 | NA                | ATQ67694.1           | Forward     | GCAAATTCGGATCGGCGAAA          |
|                                   |             |                   |                      | Reverse     | CGAGCAGAGCTCCTATGACG          |
|                                   | CQW49_07180 | NA                | ATQ67695.1           | Forward     | GTAGAGGATGAACGCCTCGC          |
|                                   |             |                   |                      | Reverse     | CAATTGCCTCGTCTTCGGTG          |
| <i>Mbn</i> operon (methanobactin) | CQW49_07120 | NA                | ATQ67684.1           | Forward     | GTGAGAGCCTGACGTTCTC           |
|                                   |             |                   |                      | Reverse     | GCAATCACCAGAAACGCTCC          |
|                                   | CQW49_07160 | <i>mbnB</i>       | ATQ70273.1           | Forward     | AGGGGAAAATATCGCGCAGT          |
|                                   |             |                   |                      | Reverse     | AGGACACGCTCGATTTCTG           |
|                                   | CQW49_07155 | <i>mbnC</i>       | ATQ67691.1           | Forward     | AAAGCTCCAGTCGAAAGCGA          |
|                                   |             |                   |                      | Reverse     | TATCAGCCTTCGGGCCTACT          |
|                                   | NA          | <i>mbnA</i>       | From literature      | Forward     | TGGAAACTCCCTTAGGAGGAA         |
|                                   |             |                   |                      | Reverse     | CTGCACGGATAGCACGAAC           |
|                                   | CQW49_07170 | <i>TonB</i>       | ATQ67693.1           | Forward     | GTAGAGGATGAACGCCTCGC          |
|                                   |             |                   |                      | Reverse     | GCAATCACCAGAAACGCTCC          |
| Reference gene                    | CQW49_06935 | 16S rRNA          | ATQ67650.1           | Forward     | TAGGCGGATTGTTAAGTCAGG         |
|                                   |             |                   |                      | Reverse     | ATTTACCTCTACACTCGCAG          |

NA: Not Applicable

Note: The complete genome of *Methylosinus trichosporium* OB3b for the primer designing of the gene set was retrieved from the GenBank accession ID: CP023737.1.
