# Supplementary material
Source: MDPI journal article supplement (https://www.mdpi.com/2674-0389/3/1/7)
Supplement: s1 [file s1]

**Table S2:** Methanobactin-mediated cellular genes, and the physical protein-protein interactions (PPIs) between the methanobactin synthesis cassette genes (*mbnB* and *mbnC*), MMOs and other enriched genes.

| Gene ID/ ORF                                 | Gene name   | UNIPROT ID | Protein names                                  | Function                                                                            | GO term (Cellular Location) | GO term (Biological Process) | GO term (Molecular Process) |
|----------------------------------------------|-------------|------------|------------------------------------------------|-------------------------------------------------------------------------------------|-----------------------------|------------------------------|-----------------------------|
| <b>Transport system/ signal transduction</b> |             |            |                                                |                                                                                     |                             |                              |                             |
| CQW49_16885                                  | NA          | A0A2D2D2Z0 | Efflux transporter periplasmic adaptor subunit | Tripartite efflux assemblies                                                        | NA                          | NA                           | NA                          |
| CQW49_11995                                  | <i>LptC</i> | A0A2D2D0J1 | LPS export ABC transporter periplasmic protein | Tripartite efflux assemblies                                                        | GO:0005887                  | NA                           | GO:0015221                  |
| CQW49_12590                                  | NA          | A0A2D2D0V5 | Apolipoprotein acyltransferase                 | Nutrient uptake/ signal transduction/ adhesion                                      | GO:0042157<br>GO:0006869    | GO:0016021<br>GO:0005576     | GO:0008289<br>GO:0016746    |
| CQW49_01190                                  | NA          | A0A2D2CV99 | Cytochrome c                                   | Electron transfer and energy transduction                                           |                             |                              | GO:0020037<br>GO:0009055    |
| CQW49_18585                                  | NA          | A0A2D2D697 | Cytochrome b                                   | Electron transfer and energy transduction                                           | GO:0022904                  | GO:0016021                   |                             |
| CQW49_03150                                  | NA          | A0A2D2CW27 | Symporter-like protein                         | Transport of two different molecules across the cell membrane in the same direction | NA                          | GO:0016021                   | GO:0022857                  |
| CQW49_19365                                  | NA          | A0A2D2D4B1 | Porin                                          | Passive diffusion of selective molecules across the membrane                        | NA                          | NA                           | NA                          |
| CQW49_15440                                  | NA          | A0A2D2D294 | Permease                                       | Catalyzes the transport of substance                                                | NA                          | GO:0016021                   | NA                          |

|                                                      |             |            |                                                    |                                                                  |            |            |                          |
|------------------------------------------------------|-------------|------------|----------------------------------------------------|------------------------------------------------------------------|------------|------------|--------------------------|
|                                                      |             |            |                                                    | across the membrane                                              |            | GO:0005886 |                          |
| <b>Cell wall biosynthesis/regulation/degradation</b> |             |            |                                                    |                                                                  |            |            |                          |
| CQW49_00125                                          | NA          | A0A2D2CUV8 | CDP-alcohol phosphatidyltransferase                | Biosynthesis                                                     | NA         | GO:0016021 | GO:0016740               |
|                                                      |             |            |                                                    |                                                                  |            |            | GO:0008955               |
| CQW49_13240                                          | NA          | A0A2D2D5S9 | Peptidoglycan glycosyltransferase                  | Shape/ size/ protection                                          | GO:0009252 | GO:0016021 | GO:0008658               |
|                                                      |             |            |                                                    |                                                                  |            |            | GO:0004180               |
| CQW49_15485                                          | NA          | A0A2D2D281 | Peptidoglycan-binding protein                      | Degradation                                                      | NA         | NA         | NA                       |
| <b>Methanobactin genes</b>                           |             |            |                                                    |                                                                  |            |            |                          |
| CQW49_19010                                          | <i>mbnT</i> | A0A2D2D407 | TonB-dependent receptor                            | substrate-specific transport across the outer membrane           | NA         | GO:0009279 | NA                       |
| CQW49_07140                                          | <i>mbnH</i> | A0A2D2CY67 | Metallo-mystery pair system four-Cys motif protein | Copper homeostasis                                               | NA         | NA         | NA                       |
| CQW49_16895                                          | <i>mbnM</i> | A0A2D2D5Z2 | TolC family protein                                | Export mechanism (multidrug resistance efflux pump)              | NA         | NA         | GO:0015562               |
| CQW49_16840                                          | NA          | A0A2D2D311 | RNA polymerase subunit sigma-24                    | Efficient binding of RNA to promoter and regulates transcription | GO:0006352 | NA         | GO:0003677<br>GO:0016987 |
| CQW49_09150                                          | NA          | A0A2D2CZ69 | Class I SAM-dependent methyltransferase            | Transfer of methyl groups                                        | GO:0032259 | NA         | GO:0008168               |
| CQW49_07150                                          | <i>mbnM</i> | A0A2D2CY63 | Multidrug resistance protein NorM                  | Export of substances across the membrane                         | NA         | GO:0016021 | GO:0042910<br>GO:0015297 |

|                        |             |            |                                                       |                                                                                                             |            |            |                          |
|------------------------|-------------|------------|-------------------------------------------------------|-------------------------------------------------------------------------------------------------------------|------------|------------|--------------------------|
| CQW49_07145            | <i>mbnN</i> | A0A2D2CYG3 | Aminotransferase class I and II                       | Mbn production                                                                                              | GO:0009058 | NA         | GO:0008483<br>GO:0030170 |
| Methane monooxygenases |             |            |                                                       |                                                                                                             |            |            |                          |
| CQW49_01225            | <i>pmoB</i> | A0A2D2D5S7 | Methane monooxygenase/ammonia monooxygenase subunit B | Methane oxidation                                                                                           | NA         | GO:0016021 | GO:0004497               |
| CQW49_01220            | <i>pmoA</i> | A0A2D2D011 | Methane monooxygenase/ammonia monooxygenase subunit A | Methane oxidation                                                                                           | NA         | GO:0016021 | GO:0004497               |
| CQW49_19210            | <i>pmoC</i> | A0A2D2D657 | Methane monooxygenase/ammonia monooxygenase subunit C | Methane oxidation                                                                                           | NA         | GO:0016021 | GO:0004497               |
| CQW49_12480            | <i>mmoX</i> | A0A2D2D5X0 | Methane monooxygenase component A alpha chain         | Methane oxidation                                                                                           | GO:0006725 | NA         | GO:0004497               |
| CQW49_12470            | <i>mmoB</i> | A0A2D2D0T8 | Methane monooxygenase regulatory protein B            | Regulator of electron flow through the soluble mmo complex/switching the enzyme from oxidase to hydroxylase | GO:0006725 | NA         | GO:0004497               |
| CQW49_12460            | <i>mmoD</i> | A0A2D2D0X7 | Soluble methane monooxygenase-binding protein MmoD    | Conformational changes within the hydroxylase catalytic center                                              | NA         | NA         | GO:0004497               |
| CQW49_12475            | <i>mmoR</i> | A0A2D2D5X7 | Methane monooxygenase reductase subunit               | shuttles electrons from NADH to the active site of hydroxylase                                              | GO:0006725 | NA         | GO:0016709               |
| Copper-associated      |             |            |                                                       |                                                                                                             |            |            |                          |

|                                                                 |             |            |                                     |                                       |                          |            |            |
|-----------------------------------------------------------------|-------------|------------|-------------------------------------|---------------------------------------|--------------------------|------------|------------|
| CQW49_01240                                                     | <i>copD</i> | A0A2D2CV13 | Copper resistance protein           | Putative involvement in copper uptake | GO:0006825               | GO:0005886 | GO:0046872 |
| CQW49_20210                                                     |             | A0A2D2D4L4 |                                     |                                       |                          | GO:0042597 | GO:0020037 |
| CQW49_02930                                                     | <i>copC</i> | A0A2D2D5A2 | Copper resistance protein           | Putative involvement in copper uptake | GO:0046688<br>GO:0006825 | GO:0042597 | GO:0005507 |
| <b>Hypothetical genes / domain containing genes<sup>1</sup></b> |             |            |                                     |                                       |                          |            |            |
| CQW49_18195                                                     | NA          | A0A2D2D3P3 | Uncharacterized protein             | NA                                    | NA                       | GO:0016021 | NA         |
| CQW49_17470                                                     | NA          | A0A2D2D3N0 | MaoC-like domain-containing protein | NA                                    | NA                       | NA         | NA         |
| CQW49_16865                                                     | NA          | A0A2D2D3D0 | GSCFA domain-containing protein     | NA                                    | NA                       | NA         | NA         |
| CQW49_16540                                                     | NA          | A0A2D2D367 | Uncharacterized protein             | NA                                    | NA                       | GO:0016021 | NA         |
| CQW49_16090                                                     | NA          | A0A2D2D2J0 | Uncharacterized protein             | NA                                    | NA                       | NA         | NA         |
| CQW49_14355                                                     | NA          | A0A2D2D1T4 | DGQHR domain-containing protein     | NA                                    | NA                       | NA         | NA         |
| CQW49_02010                                                     | NA          | A0A2D2CVS6 | DUF2232 domain-containing protein   | NA                                    | NA                       | GO:0016021 | NA         |
| CQW49_12920                                                     | NA          | A0A2D2D107 | Uncharacterized protein             | NA                                    | NA                       | NA         | NA         |
| CQW49_12835                                                     | NA          | A0A2D2D1C4 | Uncharacterized protein             | NA                                    | NA                       | GO:0016021 | NA         |
| CQW49_11915                                                     | NA          | A0A2D2D0I2 | Uncharacterized protein             | NA                                    | NA                       | NA         | NA         |
| CQW49_11245                                                     | NA          | A0A2D2D096 | Uncharacterized protein             | NA                                    | NA                       | GO:0016021 | NA         |

|             |    |                |                                             |    |    |            |            |
|-------------|----|----------------|---------------------------------------------|----|----|------------|------------|
| CQW49_01770 | NA | A0A2D2CV<br>C1 | DUF2147<br>domain-<br>containing<br>protein | NA | NA | NA         | NA         |
| CQW49_10090 | NA | A0A2D2CZ<br>P3 | YIP1 family<br>protein                      | NA | NA | GO:0016021 | NA         |
| CQW49_09945 | NA | A0A2D2CZ<br>H7 | Uncharacteriz<br>ed protein                 | NA | NA | NA         | NA         |
| CQW49_08865 | NA | A0A2D2CZ<br>B0 | NfeD domain-<br>containing<br>protein       | NA | NA | GO:0016021 | NA         |
| CQW49_06205 | NA | A0A2D2CX<br>U2 | SPOR<br>domain-<br>containing<br>protein    | NA | NA | NA         | GO:0042834 |
| CQW49_06135 | NA | A0A2D2CX<br>S9 | DUF2336<br>domain-<br>containing<br>protein | NA | NA | NA         | NA         |
| CQW49_00040 | NA | A0A2D2CU<br>X7 | DUF202<br>domain-<br>containing<br>protein  | NA | NA | GO:0016021 | NA         |

---

Note: More details are included in text under section 3.5. <sup>1</sup>Their roles need to be validated experimentally.
