# Supplementary material
Source: MDPI journal article supplement (https://www.mdpi.com/2674-0389/3/1/7)
Supplement: s1 [file s1]

**Table S1:** The specific growth rate ( $\mu$ ,  $\text{day}^{-1}$ ), and the doubling time ( $t_d$ , days) for each individual concentration. All standard deviations are within 5% of the  $\mu_{\text{max}}$  ( $\text{day}^{-1}$ ).

| Days | Specific growth rate ( $\mu$ , $\text{day}^{-1}$ ) |                 |                 |                 |                  | Doubling time ( $t_d$ , days) |                    |                    |                    |                    |
|------|----------------------------------------------------|-----------------|-----------------|-----------------|------------------|-------------------------------|--------------------|--------------------|--------------------|--------------------|
|      | 0 $\mu\text{M}$                                    | 3 $\mu\text{M}$ | 5 $\mu\text{M}$ | 6 $\mu\text{M}$ | 10 $\mu\text{M}$ | 0 $\mu\text{M}$               | 3 $\mu\text{M}$    | 5 $\mu\text{M}$    | 6 $\mu\text{M}$    | 10 $\mu\text{M}$   |
| 0    | -0.10                                              | -0.08           | -0.22           | -0.14           | -0.03            | NA                            | NA                 | NA                 | NA                 | NA                 |
| 1    | 0.11                                               | 0.15            | 0.13            | 0.20            | 0.31             | NA                            | NA                 | NA                 | NA                 | NA                 |
| 2    | 0.24                                               | 0.27            | 0.35            | 0.41            | 0.53             | NA                            | NA                 | NA                 | 1.67<br>(40 hours) | 1.30<br>(31 hours) |
| 3    | 0.31                                               | 0.30            | 0.38            | 0.38            | 0.38             | 2.25<br>(54 hours)            | 2.32<br>(56 hours) | 1.80<br>(43 hours) | NA                 | NA                 |
| 4    | 0.22                                               | 0.23            | 0.30            | 0.28            | 0.27             | NA                            | NA                 | NA                 | NA                 | NA                 |
| 5    | 0.17                                               | 0.19            | 0.23            | 0.22            | 0.23             | NA                            | NA                 | NA                 | NA                 | NA                 |
| 6    | 0.14                                               | 0.14            | 0.18            | 0.16            | 0.15             | NA                            | NA                 | NA                 | NA                 | NA                 |
| 7    | 0.10                                               | 0.10            | 0.13            | 0.12            | 0.11             | NA                            | NA                 | NA                 | NA                 | NA                 |
| 8    | 0.05                                               | 0.05            | 0.08            | 0.07            | 0.06             | NA                            | NA                 | NA                 | NA                 | NA                 |
| 9    | 0.00                                               | -0.01           | 0.03            | 0.01            | 0.00             | NA                            | NA                 | NA                 | NA                 | NA                 |
| 10   | -0.07                                              | -0.08           | -0.04           | -0.07           | -0.08            | NA                            | NA                 | NA                 | NA                 | NA                 |
