# Supplementary material
Source: MDPI journal article supplement (https://www.mdpi.com/2674-0389/3/1/7)
Supplement: s1 [file s1]

**Table S5:** Forward and reverse primers of gene sets used in expression studies.

| Operon                            | Gene Id     | Gene names        | Protein accession ID | Primer name | qPCR Primer sequence (5'→ 3') |
|-----------------------------------|-------------|-------------------|----------------------|-------------|-------------------------------|
| sMMO                              | NA          | <i>mmoX</i>       | CAA39068.2           | Forward     | TGGAGTGCTCGGTCAATCTG          |
|                                   |             |                   |                      | Reverse     | GACACCACGGTCTGGTAGCC          |
|                                   | NA          | <i>mmoR</i>       | CAD61955.1           | Forward     | GACCGCTCTGCGCAAAGCC           |
|                                   |             |                   |                      | Reverse     | CCCTCATAGCCGAACAATTCG         |
| pMMO                              | NA          | <i>mmoC</i>       | CAB45257.1           | Forward     | AGGAGGAGGACGGCAAGGTT<br>C     |
|                                   |             |                   |                      | Reverse     | AGCACGAGACGCACGACATT<br>GG    |
|                                   | NA          | <i>pmo operon</i> | U31650.2             | Forward     | GCGTTCTTCTCGGGCTTCG           |
|                                   |             |                   |                      | Reverse     | CGGCCTCACTCGTCTTCTCC          |
| pMMO                              | NA          | <i>pmoA</i>       | AAA87220.2           | Forward     | TGCTGATCGGGGAGTGGATC          |
|                                   |             |                   |                      | Reverse     | ACGTGCGGACGAAGTGGAA           |
|                                   | NA          | <i>pmoB</i>       | AAF37894.1           | Forward     | ACATGGCCGACTTCAAGGATC<br>C    |
|                                   |             |                   |                      | Reverse     | TCGCTGATGCGAAGATAAGAA<br>CG   |
|                                   | NA          | <i>pmoC</i>       | AAF37893.1           | Forward     | TGGAAGACCCGTGACCGC            |
|                                   |             |                   |                      | Reverse     | ATGTGCGACGGCGTGAAGT           |
| <i>Mbn</i> operon (methanobactin) | CQW49_07125 | NA                | ATQ67685.1           | Forward     | AGGAAATCGACATCTGCGCT          |
|                                   |             |                   |                      | Reverse     | GGAGATTGCAATTCGGCTCG          |
|                                   | CQW49_07130 | NA                | ATQ67686.1           | Forward     | FCCGCAGATCCGCCATATGAT         |
|                                   |             |                   |                      | Reverse     | ATACGCAGATACGCCTGTCTG         |
|                                   | CQW49_07135 | NA                | ATQ67687.1           | Forward     | CATAGCGGCTGTCTGAAGGAA         |
|                                   |             |                   |                      | Reverse     | GCCAATAAGGCGGAGATCGT          |
|                                   | CQW49_07140 | NA                | ATQ67688.1           | Forward     | AGAGAATATCGGCGAGACGC          |
|                                   |             |                   |                      | Reverse     | TTTGACGACGCTGTTCGAGA          |
|                                   | CQW49_07175 | NA                | ATQ67694.1           | Forward     | GCAAATTCGGATCGGCGAAA          |
|                                   |             |                   |                      | Reverse     | CGAGCAGAGCTCCTATGACG          |
|                                   | CQW49_07180 | NA                | ATQ67695.1           | Forward     | GTAGAGGATGAACGCCTCGC          |
|                                   |             |                   |                      | Reverse     | CAATTGCCTCGTCTTCGGTG          |
|                                   | CQW49_07120 | NA                | ATQ67684.1           | Forward     | GTGAGAGCCTGACGTTCTC           |
|                                   |             |                   |                      | Reverse     | GCAATCACCAGAAACGCTCC          |
|                                   | CQW49_07160 | <i>mbnB</i>       | ATQ70273.1           | Forward     | AGGGGAAAATATCGCGCAGT          |
|                                   |             |                   |                      | Reverse     | AGGACACGCTCGATTTCTG           |
|                                   | CQW49_07155 | <i>mbnC</i>       | ATQ67691.1           | Forward     | AAAGCTCCAGTCGAAAGCGA          |
|                                   |             |                   |                      | Reverse     | TATCAGCCTTCGGGCCTACT          |
|                                   | NA          | <i>mbnA</i>       | From literature      | Forward     | TGGAAACTCCCTTAGGAGGAA         |
|                                   |             |                   |                      | Reverse     | CTGCACGGATAGCACGAAC           |
|                                   | CQW49_07170 | <i>TonB</i>       | ATQ67693.1           | Forward     | GTAGAGGATGAACGCCTCGC          |
|                                   |             |                   |                      | Reverse     | GCAATCACCAGAAACGCTCC          |
| Reference gene                    | CQW49_06935 | 16S rRNA          | ATQ67650.1           | Forward     | TAGGCGGATTGTTAAGTCAGG         |
|                                   |             |                   |                      | Reverse     | ATTTACCTCTACACTCGCAG          |

NA: Not Applicable

Note: The complete genome of *Methylosinus trichosporium* OB3b for the primer designing of the gene set was retrieved from the GenBank accession ID: CP023737.1.
